# Supplementary material
Source: PubMed Central journal article supplement (PMC5009266)
Supplement: 10.1074_M116.739425_jbc.M116.739425-1.pdf [file 10.1074_M116.739425_jbc.M116.739425-1.pdf]

# **Supplemental Information to**

## **Conservation and divergence in nucleotide excision repair lesion recognition**

**Wirth, N.<sup>†</sup>, Gross, J.<sup>†</sup>, Roth, H.M., Büchner, C.N., Kisker, C., Tessmer, I.<sup>\*</sup>**

# Supplemental Figures

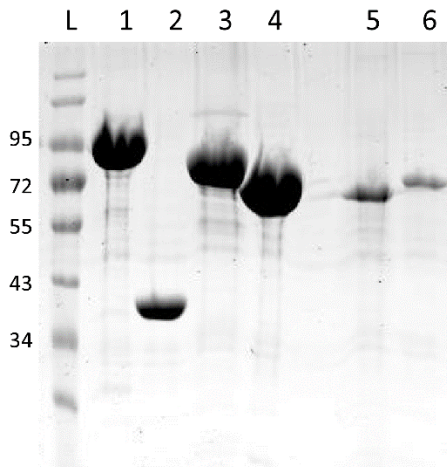

**Figure S1: SDS gel of all proteins used in these studies.** (1) *ctXPD*, (2) *ctp44(1-285)*, (3) *BcaUvrB* wild type, (4) *BcaUvrB* $\Delta$ 4, (5) *BcaUvrC*, (6) *TmaUvrC*.

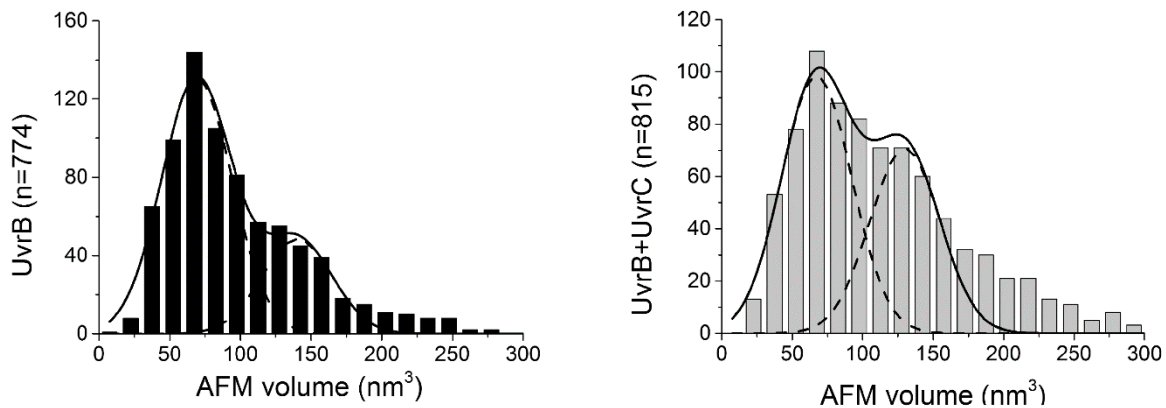

**Figure S2: AFM volume distributions of DNA bound complexes.** (Left) UvrB and (right) UvrB+UvrC. Gaussian fits to the data show maxima at  $\sim 70$  nm<sup>3</sup> and  $\sim 140$  nm<sup>3</sup> for samples of UvrB alone as well as UvrB+UvrC. Volumes of 50-110 nm<sup>3</sup> were classed as monomeric UvrB complexes and volumes of 110-250 nm<sup>3</sup> as potential UvrBC (or dimeric UvrB) complexes. DNA bound peaks in samples containing both UvrB and UvrC show  $\sim 45\%$  of volumes in the size range of UvrBC complexes versus  $<30\%$  (representing UvrB dimers) in the absence of UvrC.

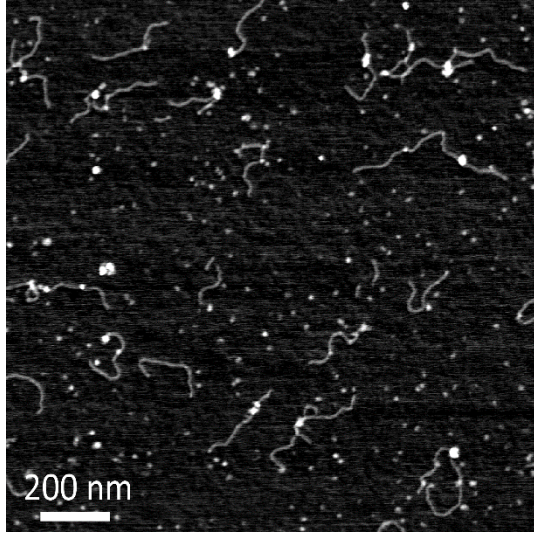

**Figure S3: AFM of UvrC aggregates.** At high concentrations, UvrC forms aggregates with DNA (large white peaks on the DNA substrates).

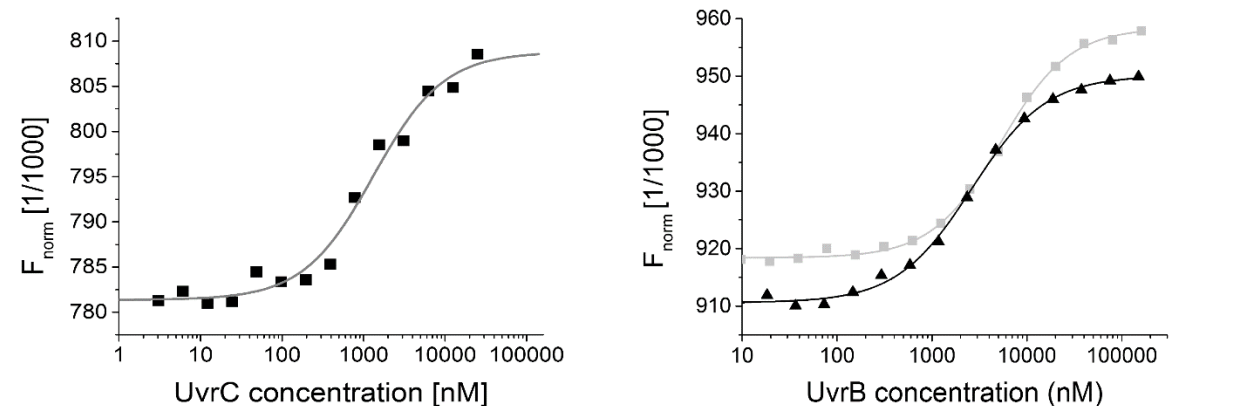

**Figure S4: MST of interactions of UvrB with UvrC and with DNA.** (Left) UvrB-UvrC interaction, (right) UvrB interactions with DNA substrates. The lines represent Hill equation fits to the data (symbols), giving an approximate  $K_D$  of 500 nM for the UvrB-UvrC interaction and  $K_D$ 's in the low micromolar range for UvrB interactions with dsDNA (grey line) and dsDNA containing an 8 nt unpaired region (DNA bubble, black line).

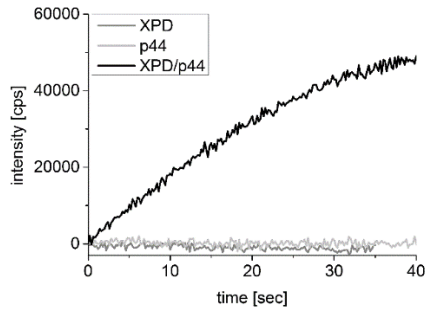

**Figure S5: XPD helicase activity.** Helicase assay for XPD in the presence (black line) and absence (dark grey) of its activating factor p44. P44 alone was also applied as a control (light grey line).

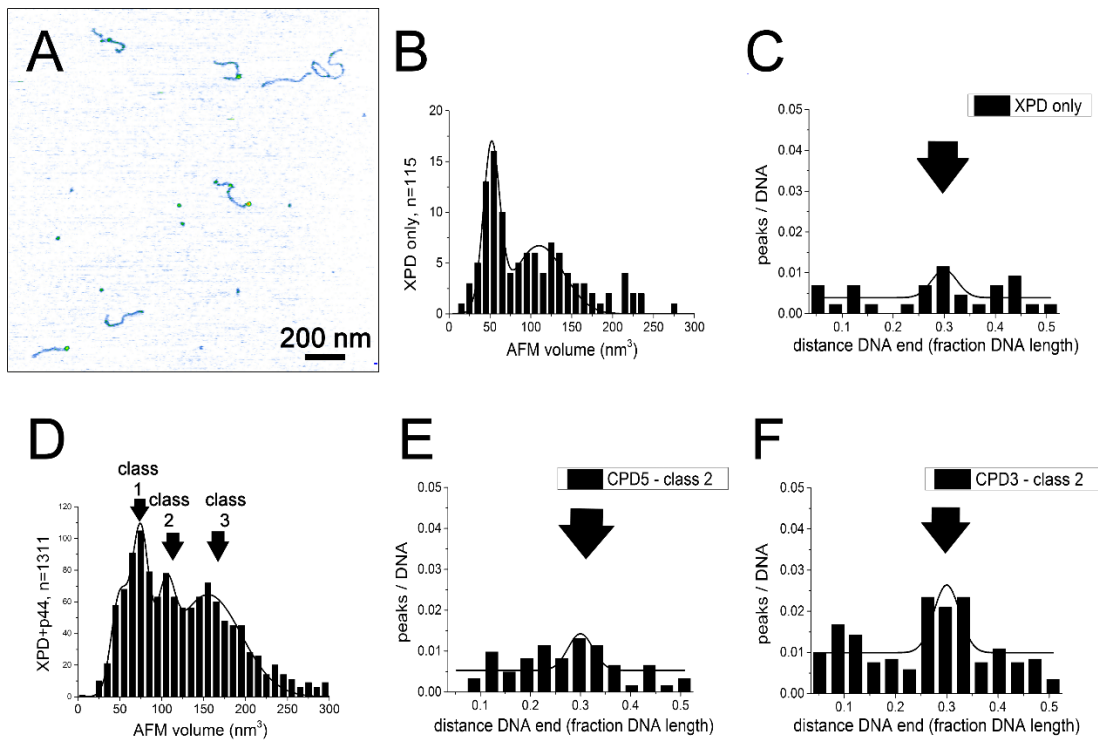

**Figure S6: AFM imaging of XPD/(p44)-DNA complexes.** (A) Representative image section of DNA sample containing only XPD (no p44). (B) Volume and (C) position distribution of DNA bound complexes in samples containing only XPD (no p44) including Gaussian fits to the data. (D) Volume distribution of DNA bound complexes for XPD+p44 samples. Comparison to volume distribution in the absence of p44 (B) reveals a distinct enhancement of volumes in the range between 140 and 250 nm<sup>3</sup> (class 3). (E,F) Position distributions of class 2 peaks (80-140 nm<sup>3</sup>, interpreted as monomeric XPD complexes) in XPD/p44 samples with CPD/5'bubble (E) and XPD/3'bubble (F) DNA substrates. Class 2 peaks show clearly less specificity for the lesion position (at ~30% of DNA fragment length, arrows) compared to class 3 peaks (Figure 4).

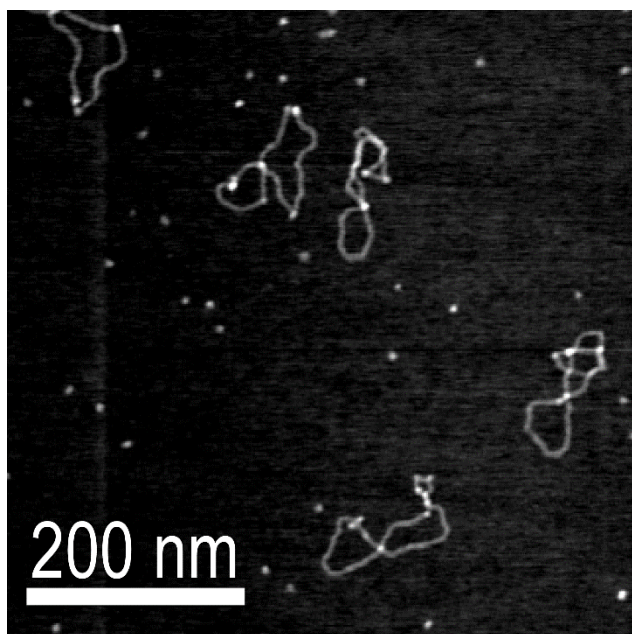

**Figure S7: AFM of UvrB binding to closed circular plasmid DNA.**

**Supplemental Table S1: DNA substrates.** Underlined sequences indicate an unpaired region (DNA bubble) in the annealed substrate. Lesions are shown in bold and red: F = fluorescein adducted thymine, T-T = cyclobutane pyrimidine dimer (CPD). The length of the oligonucleotides is given (in units of nucleotides, nts) as well as their experimental application.

|      | sequence                                                                                                                                                        | nts | experiments                      |
|------|-----------------------------------------------------------------------------------------------------------------------------------------------------------------|-----|----------------------------------|
| 1    | TACGGCCTCATCTTCAACGCAATC (no damage containing top strand)                                                                                                      | 24  | EMSA, AUC                        |
| 1'   | TACGGCCTCATC <b>F</b> TCAACGCAATC (fluorescein containing top strand)                                                                                           | 24  |                                  |
| 2    | GATTGCGTCTTTTTTGAGGCCGTA(bottom strand containing 6 nts bubble)                                                                                                 | 24  | Incision assays<br>with F lesion |
| 3    | GGGCGGCCGCGCATTAACTGAGGTCAGGCACCCGTACGTGACGTCAGT<br>GAGACGAGC <b>F</b> GCATGGAGGCACCGATGCCCTGGATTTAACGCGCGCGC<br>CCG (fluorescein lesion containing top strand) | 100 |                                  |
| 4    | CGGGCGCGCGCGTTAAATCCAGGGCATCGGTGCCTCCATGCAGCTCGT<br>CTCACTGACGTCACGTACGGGTGCCTGACCTCAGTTAAATGCGCGGCC<br>GCCC (>>no bubble)                                      | 100 |                                  |
| 5    | CGGGCGCGCGCGTTAAATCCAGGGCATCGGTGCCTCCA <u>ACATAA</u> TCGT<br>CTCACTGACGTCACGTACGGGTGCCTGACCTCAGTTAAATGCGCGGCC<br>GCCC (>> 6 nts central bubble around lesion)   | 100 |                                  |
| 6    | CGGGCGCGCGCGTTAAATCCAGGGCATCGGTGCCTCCATGCAGCTCGT<br>CTCACTGACGTCACGTACGGGTGCCTGACCTCAG <u>AATTTAG</u> CG CGG CC<br>GCCC (>> 6 nts bubble 40 nts 5' from lesion) | 100 |                                  |
| 7    | CGGGCGCGCGCGA <u>ATTTACC</u> AGGGCATCGGTGCCTCCATGCAGCTCGT<br>CTCACTGACGTCACGTACGGGTGCCTGACCTCAGTTAAATGCG CGG CC<br>GCCC (>> 6 nts bubble 24 bps 3' from lesion) | 100 |                                  |
| 8    | F-AGCTATGACAGCTATGACCATGAT <b>T-T</b> ACGAATTGCTTGAATCCTGA<br>CGAACTGTAG (CPD lesion containing top strand)                                                     | 57  |                                  |
| 9    | CTACAGTTCGTCAGGATTCCAAGCAATTCGTAATCATGGTCATAGCTGT<br>CATAGCT (>>no bubble)                                                                                      | 57  |                                  |
| 10   | CTACAGTTCGTCAGGATTCCAAGCAATTC <u>TATTTAC</u> ATGGTCATAGCTGT<br>CATAGCT (>> 6 nts central bubble around lesion)                                                  | 57  |                                  |
| 11   | CTACAGTTCGTCAGGATTCCAAGCAATTCGTAATCATGGTCATA<br><u>TAATAA</u> ATAGCT (>> 6 nts bubble 13 bps 5' from lesion)                                                    | 57  |                                  |
| 12   | CTACAGTTCGTCAT <u>TTAAACA</u> AGCAATTCGTAATCATGGTCATAGCTGT<br>CATAGCT (>> 6 nts bubble 13 bps 3' from lesion)                                                   | 57  |                                  |
| 13   | GGTCGACTCTAGAGGATCAGATCTGGTACCTCTAGACTCGAGGCATGC<br>(>> AFM substrate preparation and bottom strand for BLI and MST)                                            | 48  | AFM, BLI, MST                    |
| 14   | /Phos/GCATGCCTCG <u>TCAAATCT</u> GGTACCAGATCTGATCCTCTAGAGTC<br><b>G</b> FCC (>> 8 nts bubble 27 bps 5' from fluorescein lesion)                                 | 48  | AFM                              |
| 15   | /Phos/GCA <b>F</b> GCTCGAGTCTAGAGGTACCAGATCT <u>CTAAAGTA</u> AGAGTCGACC<br>(>> 8 nts bubble 26 bps 3' from fluorescein lesion)                                  | 48  | with F lesion                    |
| 16   | /5Phos/GCATGCCTCGTCAAATCTGGTACCAGATCTGATCCTCTAGAT <b>-TC</b> GACC<br>(>> 8 nts bubble 23 bps 5' from CPD lesion)                                                | 48  | AFM                              |
| 17   | /5Phos/GCATGC <b>T-T</b> CGAGTCTAGAGGTACCAGATCT <u>CTAAAGTA</u> AGA<br>GTCGACC (>> 8 nts bubble 23 bps 3' from CPD lesion)                                      | 48  | with CPD lesion                  |
| 18   | GCATGCCTCGAGTCTAGAGGTACCAGATCTGATCCTCTAGAGTCGACC                                                                                                                | 48  | EMSA, BLI, MST                   |
| 19   | GCATGCCTCGAGTCTAGACTCT <u>TTCCAT</u> CTGATCCTCTAGAGTCGACC<br>(>> 8 nts bubble, no lesion)                                                                       | 48  |                                  |
| 19'  | GCATGCCTCGAGTCTAGACTC <b>F</b> TTCCATCTGATCCTCTAGAGTCGACC<br>(>> 8 nts central bubble around fluorescein lesion)                                                | 48  |                                  |
| 19'' | GCATGCCTCGAGTCTAGACTC <b>T-T</b> TCCATCTGATCCTCTAGAGTCGACC<br>(>> 8 nts central bubble around CPD lesion)                                                       | 48  |                                  |
| 20   | Dabcyl-GCTATGACCATGATTACGAATTGCTT                                                                                                                               | 26  | Helicase assay                   |
| 21   | AGCTACCATGCCTGCACGAATTAAGCAATTCGTAATCATGGTCATAGC-Cy3                                                                                                            | 48  |                                  |
